# Supplementary material for: Discovery of sparse, reliable omic biomarkers with Stabl
Source: PubMed Central journal article supplement (PMC11217152; doi:10.1038/s41587-023-02033-x), 2024-01-02
Supplement: NIHMS1960016-supplement-supplemental_PMID38168992.pdf [file NIHMS1960016-supplement-supplemental_PMID38168992.pdf]

|                                                  | Number of lambdas | Number of bootstraps | Equivalent number of Lasso runs | Time to run (Stabl) |
|--------------------------------------------------|-------------------|----------------------|---------------------------------|---------------------|
| <b>PE – CFRNA (159 samples, 37184 features)</b>  |                   |                      |                                 |                     |
| Stabl <sub>L</sub> -RP                           | 30                | 150                  | 4 500                           | 06 min 50 s         |
| Stabl <sub>AL</sub> -RP                          | 30                | 150                  | 4 500                           | 10 min 06 s         |
| Stabl <sub>EN</sub> -RP                          | 30                | 50                   | 1 500                           | 39 min 00 s         |
| <b>COVID-19 – Proteomics (68, 1463)</b>          |                   |                      |                                 |                     |
| Stabl <sub>L</sub> -MX                           | 30                | 1000                 | 30 000                          | 00 min 38 s         |
| Stabl <sub>L</sub> -RP                           | 30                | 1000                 | 30 000                          | 00 min 38 s         |
| Stabl <sub>AL</sub> -MX                          | 30                | 1000                 | 30 000                          | 00 min 47 s         |
| Stabl <sub>AL</sub> -RP                          | 30                | 1000                 | 30 000                          | 00 min 47 s         |
| Stabl <sub>EN</sub> -MX                          | 30                | 100                  | 3 000                           | 11 min 31 s         |
| Stabl <sub>EN</sub> -RP                          | 30                | 100                  | 3 000                           | 11 min 27 s         |
| <b>Onset of Labor – Proteomics (150, 1317)</b>   |                   |                      |                                 |                     |
| Stabl <sub>L</sub> -MX                           | 30                | 1000                 | 30 000                          | 01 min 17 s         |
| Stabl <sub>L</sub> -RP                           | 30                | 1000                 | 30 000                          | 01 min 12 s         |
| Stabl <sub>AL</sub> -MX                          | 30                | 1000                 | 30 000                          | 01 min 34 s         |
| Stabl <sub>AL</sub> -RP                          | 30                | 1000                 | 30 000                          | 01 min 25 s         |
| Stabl <sub>EN</sub> -MX                          | 30                | 1000                 | 30 000                          | 01 min 10 s         |
| Stabl <sub>EN</sub> -RP                          | 30                | 1000                 | 30 000                          | 01 min 08 s         |
| <b>Onset of Labor – Metabolomics (150, 3529)</b> |                   |                      |                                 |                     |
| Stabl <sub>L</sub> -MX                           | 30                | 1000                 | 30 000                          | 04 min 11 s         |
| Stabl <sub>L</sub> -RP                           | 30                | 1000                 | 30 000                          | 03 min 46 s         |
| Stabl <sub>AL</sub> -MX                          | 30                | 1000                 | 30 000                          | 05 min 24 s         |
| Stabl <sub>AL</sub> -RP                          | 30                | 1000                 | 30 000                          | 04 min 55 s         |
| Stabl <sub>EN</sub> -MX                          | 30                | 1000                 | 30 000                          | 03 min 57 s         |
| Stabl <sub>EN</sub> -RP                          | 30                | 1000                 | 30 000                          | 03 min 22 s         |
| <b>Onset of Labor – CyTOF (150, 1502)</b>        |                   |                      |                                 |                     |
| Stabl <sub>L</sub> -MX                           | 30                | 1000                 | 30 000                          | 01 min 04 s         |
| Stabl <sub>L</sub> -RP                           | 30                | 1000                 | 30 000                          | 01 min 18 s         |
| Stabl <sub>AL</sub> -MX                          | 30                | 1000                 | 30 000                          | 01 min 12 s         |
| Stabl <sub>AL</sub> -RP                          | 30                | 1000                 | 30 000                          | 01 min 26 s         |
| Stabl <sub>EN</sub> -MX                          | 30                | 1000                 | 30 000                          | 00 min 57 s         |
| Stabl <sub>EN</sub> -RP                          | 30                | 1000                 | 30 000                          | 00 min 41 s         |
| <b>Dream – Taxonomy (1569, 3725)</b>             |                   |                      |                                 |                     |
| Stabl <sub>L</sub> -MX                           | 30                | 250                  | 7 500                           | 08 min 05 s         |
| Stabl <sub>L</sub> -RP                           | 30                | 250                  | 7 500                           | 07 min 56 s         |
| Stabl <sub>AL</sub> -MX                          | 30                | 250                  | 7 500                           | 12 min 35 s         |
| Stabl <sub>AL</sub> -RP                          | 30                | 250                  | 7 500                           | 10 min 30 s         |
| Stabl <sub>EN</sub> -MX                          | 15                | 50                   | 750                             | 51 min 19 s         |
| Stabl <sub>EN</sub> -RP                          | 15                | 50                   | 750                             | 44 min 42 s         |
| <b>Dream – Phylotype (1569, 5468)</b>            |                   |                      |                                 |                     |
| Stabl <sub>L</sub> -MX                           | 30                | 250                  | 7 500                           | 06 min 13 s         |
| Stabl <sub>L</sub> -RP                           | 30                | 250                  | 7 500                           | 06 min 40 s         |
| Stabl <sub>AL</sub> -MX                          | 30                | 250                  | 7 500                           | 09 min 03 s         |
| Stabl <sub>AL</sub> -RP                          | 30                | 250                  | 7 500                           | 08 min 38 s         |
| Stabl <sub>EN</sub> -MX                          | 15                | 50                   | 750                             | 40 min 37 s         |
| Stabl <sub>EN</sub> -RP                          | 15                | 50                   | 750                             | 36 min 39 s         |
| <b>SSI – Proteomics (91, 721)</b>                |                   |                      |                                 |                     |
| Stabl <sub>L</sub> -MX                           | 30                | 1000                 | 30 000                          | 00 min 29 s         |
| Stabl <sub>L</sub> -RP                           | 30                | 1000                 | 30 000                          | 00 min 29 s         |
| Stabl <sub>AL</sub> -MX                          | 30                | 1000                 | 30 000                          | 00 min 35 s         |
| Stabl <sub>AL</sub> -RP                          | 30                | 1000                 | 30 000                          | 00 min 35 s         |
| Stabl <sub>EN</sub> -MX                          | 30                | 1000                 | 30 000                          | 43 min 25 s         |
| Stabl <sub>EN</sub> -RP                          | 30                | 1000                 | 30 000                          | 37 min 59 s         |
| <b>SSI – CyTOF (93, 1125)</b>                    |                   |                      |                                 |                     |
| Stabl <sub>L</sub> -MX                           | 30                | 1000                 | 30 000                          | 00 min 30 s         |
| Stabl <sub>L</sub> -RP                           | 30                | 1000                 | 30 000                          | 00 min 31 s         |
| Stabl <sub>AL</sub> -MX                          | 30                | 1000                 | 30 000                          | 00 min 38 s         |
| Stabl <sub>AL</sub> -RP                          | 30                | 1000                 | 30 000                          | 00 min 38 s         |
| Stabl <sub>EN</sub> -MX                          | 30                | 1000                 | 30 000                          | 47 min 45 s         |
| Stabl <sub>EN</sub> -RP                          | 30                | 1000                 | 30 000                          | 47 min 35 s         |

**Supplementary Table S1 | Computation time and complexity for all clinical case studies.** All benchmarks were launched using an EC2 instances on AWS (32 CPU, 128 GiB of ram).

**Supplementary Table S2 | Benchmarking on synthetic data: comprehensive table of results.** A comprehensive table numerically listing the results of all benchmark experiments on synthetic datasets and scenarios (Stabl<sub>SRM</sub> with four SRMs, tested on regression and classification tasks, three correlation structures, and four data distributions) are reported in a comprehensive and searchable online table. <https://github.com/gregbellan/Stabl/blob/main/Extended%20Data%20Table%20S2.xlsx>

|                  | n    | Stabl              |                   |                  |                 | Late fusion Lasso     |                   |                  |                 |
|------------------|------|--------------------|-------------------|------------------|-----------------|-----------------------|-------------------|------------------|-----------------|
|                  |      | Sparsity           | Reliability (FDR) | Reliability (JI) | Predictivity    | Sparsity              | Reliability (FDR) | Reliability (JI) | Predictivity    |
| <b>Example 1</b> | 50   | 5 (1 - 9.8)        | 1 (0.9 - 1)       | 0 (0 - 0)        | 1.3 (1.2 - 1.3) | 10.5 (1 - 28.5)       | 1 (0.8 - 1)       | 0 (0 - 0)        | 1.1 (1.1 - 1.2) |
|                  | 75   | 31 (16.2 - 47.2)   | 1 (0.9 - 1)       | 0 (0 - 0.1)      | 1.3 (1.2 - 1.4) | 8 (0 - 20)            | 0.9 (0 - 1)       | 0 (0 - 0)        | 1.1 (1.1 - 1.2) |
|                  | 100  | 48.5 (32.2 - 97.5) | 1 (0.9 - 1)       | 0 (0 - 0)        | 1.3 (1.3 - 1.6) | 15 (1 - 27.5)         | 0.9 (0.8 - 1)     | 0 (0 - 0.1)      | 1.1 (1.1 - 1.1) |
|                  | 150  | 29 (17 - 102.2)    | 0.9 (0.8 - 1)     | 0 (0 - 0.1)      | 1.2 (1.2 - 1.4) | 30.5 (15.2 - 43.8)    | 0.9 (0.8 - 1)     | 0.1 (0 - 0.1)    | 1.1 (1.1 - 1.1) |
|                  | 200  | 26 (18 - 127.2)    | 0.9 (0.9 - 1)     | 0 (0 - 0.1)      | 1.2 (1.2 - 1.4) | 52.5 (40.2 - 64)      | 0.9 (0.8 - 0.9)   | 0.1 (0.1 - 0.1)  | 1.1 (1 - 1.1)   |
|                  | 300  | 33.5 (20.2 - 135)  | 0.8 (0.8 - 1)     | 0.1 (0 - 0.1)    | 1.1 (1 - 1.2)   | 80.5 (64.8 - 96.5)    | 0.8 (0.8 - 0.9)   | 0.1 (0.1 - 0.1)  | 1 (1 - 1)       |
|                  | 400  | 27.5 (19.5 - 42.5) | 0.8 (0.7 - 0.9)   | 0.1 (0.1 - 0.2)  | 1 (1 - 1.1)     | 98.5 (78 - 123)       | 0.9 (0.8 - 0.9)   | 0.1 (0.1 - 0.2)  | 0.9 (0.9 - 1)   |
|                  | 600  | 28.5 (25 - 35.5)   | 0.7 (0.6 - 0.7)   | 0.2 (0.2 - 0.2)  | 0.9 (0.8 - 0.9) | 106.5 (93.8 - 136.5)  | 0.8 (0.8 - 0.9)   | 0.1 (0.1 - 0.2)  | 0.9 (0.9 - 0.9) |
|                  | 800  | 32 (29 - 39.5)     | 0.6 (0.6 - 0.7)   | 0.3 (0.2 - 0.3)  | 0.8 (0.8 - 0.8) | 133 (111 - 151.8)     | 0.9 (0.8 - 0.9)   | 0.1 (0.1 - 0.2)  | 0.9 (0.9 - 0.9) |
|                  | 1000 | 31.5 (28.2 - 39)   | 0.6 (0.5 - 0.7)   | 0.3 (0.3 - 0.3)  | 0.8 (0.7 - 0.8) | 126.5 (109.5 - 137.5) | 0.8 (0.8 - 0.9)   | 0.2 (0.1 - 0.2)  | 0.9 (0.9 - 0.9) |
| <b>Example 2</b> | 50   | 4 (2 - 10)         | 1 (0.9 - 1)       | 0 (0 - 0)        | 1.3 (1.2 - 1.4) | 10.5 (1 - 25.8)       | 1 (0.8 - 1)       | 0 (0 - 0)        | 1.1 (1.1 - 1.2) |
|                  | 75   | 37 (23.2 - 50.8)   | 1 (0.9 - 1)       | 0 (0 - 0)        | 1.3 (1.3 - 1.5) | 11 (3.2 - 31.2)       | 0.9 (0.9 - 1)     | 0 (0 - 0)        | 1.1 (1.1 - 1.2) |
|                  | 100  | 43.5 (24.8 - 95.5) | 0.9 (0.9 - 1)     | 0 (0 - 0.1)      | 1.3 (1.2 - 1.6) | 17 (4.5 - 28)         | 0.9 (0.9 - 1)     | 0 (0 - 0)        | 1.1 (1.1 - 1.1) |
|                  | 150  | 28 (15 - 51.8)     | 0.9 (0.9 - 0.9)   | 0.1 (0 - 0.1)    | 1.2 (1.2 - 1.3) | 21 (10.2 - 38.5)      | 0.9 (0.8 - 0.9)   | 0 (0 - 0.1)      | 1.1 (1.1 - 1.1) |
|                  | 200  | 21 (15.5 - 44.8)   | 0.9 (0.8 - 0.9)   | 0.1 (0 - 0.1)    | 1.2 (1.1 - 1.2) | 35 (11 - 49.8)        | 0.9 (0.8 - 0.9)   | 0.1 (0.1 - 0.1)  | 1.1 (1.1 - 1.1) |
|                  | 300  | 23 (16 - 33)       | 0.8 (0.7 - 0.9)   | 0.1 (0.1 - 0.2)  | 1.1 (1 - 1.1)   | 65 (42.2 - 83.8)      | 0.9 (0.8 - 0.9)   | 0.1 (0.1 - 0.1)  | 1.1 (1.1 - 1.1) |
|                  | 400  | 17 (15 - 22.8)     | 0.7 (0.6 - 0.8)   | 0.2 (0.1 - 0.2)  | 1 (0.9 - 1)     | 89 (75.2 - 106.8)     | 0.9 (0.8 - 0.9)   | 0.1 (0.1 - 0.1)  | 1.1 (1 - 1.1)   |
|                  | 600  | 21 (19 - 24.8)     | 0.6 (0.6 - 0.7)   | 0.2 (0.2 - 0.2)  | 0.9 (0.8 - 0.9) | 115.5 (86.5 - 138.2)  | 0.9 (0.8 - 0.9)   | 0.1 (0.1 - 0.1)  | 1 (1 - 1)       |
|                  | 800  | 24 (22.2 - 27)     | 0.6 (0.6 - 0.6)   | 0.3 (0.2 - 0.3)  | 0.8 (0.8 - 0.8) | 112.5 (101.2 - 137.8) | 0.8 (0.8 - 0.9)   | 0.1 (0.1 - 0.2)  | 1 (1 - 1)       |
|                  | 1000 | 26 (23 - 28)       | 0.6 (0.5 - 0.6)   | 0.3 (0.3 - 0.3)  | 0.8 (0.8 - 0.8) | 125.5 (109.8 - 147.2) | 0.9 (0.8 - 0.9)   | 0.1 (0.1 - 0.2)  | 1 (1 - 1)       |
| <b>Example 3</b> | 50   | 15 (8 - 27.2)      | 1 (0.9 - 1)       | 0 (0 - 0)        | 1.3 (1.3 - 1.4) | 4 (1.2 - 20.2)        | 1 (0.9 - 1)       | 0 (0 - 0)        | 1.1 (1.1 - 1.2) |
|                  | 75   | 26 (10.8 - 43.8)   | 1 (0.9 - 1)       | 0 (0 - 0)        | 1.3 (1.3 - 1.5) | 11.5 (3 - 26.2)       | 0.9 (0.8 - 1)     | 0 (0 - 0)        | 1.1 (1.1 - 1.2) |
|                  | 100  | 42.5 (25.2 - 84)   | 0.9 (0.9 - 1)     | 0 (0 - 0)        | 1.3 (1.2 - 1.5) | 7 (1 - 23.8)          | 0.9 (0.6 - 1)     | 0 (0 - 0)        | 1.1 (1.1 - 1.1) |
|                  | 150  | 23 (16.2 - 53)     | 0.9 (0.9 - 0.9)   | 0 (0 - 0.1)      | 1.2 (1.2 - 1.3) | 18.5 (9 - 39.8)       | 0.9 (0.9 - 0.9)   | 0 (0 - 0.1)      | 1.1 (1.1 - 1.1) |
|                  | 200  | 21.5 (14.5 - 73)   | 0.9 (0.8 - 0.9)   | 0.1 (0 - 0.1)    | 1.2 (1.1 - 1.2) | 28 (12.8 - 53.2)      | 0.9 (0.8 - 0.9)   | 0.1 (0.1 - 0.1)  | 1.1 (1.1 - 1.1) |
|                  | 300  | 21 (17 - 28.8)     | 0.8 (0.7 - 0.8)   | 0.1 (0.1 - 0.1)  | 1.1 (1 - 1.1)   | 75 (51 - 88)          | 0.9 (0.9 - 0.9)   | 0.1 (0.1 - 0.1)  | 1.1 (1.1 - 1.1) |
|                  | 400  | 23 (18 - 28)       | 0.7 (0.6 - 0.8)   | 0.1 (0.1 - 0.2)  | 1 (1 - 1)       | 100.5 (77.2 - 115)    | 0.9 (0.8 - 0.9)   | 0.1 (0.1 - 0.1)  | 1 (1 - 1)       |
|                  | 600  | 24 (19.2 - 25.8)   | 0.6 (0.6 - 0.7)   | 0.2 (0.2 - 0.2)  | 0.9 (0.8 - 0.9) | 114 (92.5 - 149.8)    | 0.9 (0.8 - 0.9)   | 0.1 (0.1 - 0.1)  | 1 (1 - 1)       |
|                  | 800  | 26 (22.2 - 32.5)   | 0.6 (0.6 - 0.6)   | 0.3 (0.2 - 0.3)  | 0.8 (0.8 - 0.8) | 149.5 (107.8 - 161.8) | 0.9 (0.9 - 0.9)   | 0.1 (0.1 - 0.1)  | 1 (0.9 - 1)     |
|                  | 1000 | 27 (25 - 30)       | 0.6 (0.6 - 0.6)   | 0.3 (0.2 - 0.3)  | 0.8 (0.8 - 0.8) | 140.5 (126.2 - 149.5) | 0.9 (0.9 - 0.9)   | 0.1 (0.1 - 0.1)  | 0.9 (0.9 - 0.9) |
| <b>Example 4</b> | 50   | 16.5 (11.2 - 32.5) | 0.9 (0.9 - 1)     | 0 (0 - 0)        | 1.3 (1.3 - 1.4) | 8.5 (3 - 27.5)        | 0.9 (0.9 - 1)     | 0 (0 - 0)        | 1.1 (1.1 - 1.2) |
|                  | 75   | 15.5 (10.2 - 45.8) | 0.9 (0.9 - 1)     | 0 (0 - 0.1)      | 1.3 (1.2 - 1.4) | 13.5 (2 - 27.2)       | 0.9 (0.9 - 1)     | 0 (0 - 0)        | 1.1 (1.1 - 1.2) |
|                  | 100  | 39 (23.2 - 79)     | 0.9 (0.9 - 0.9)   | 0.1 (0 - 0.1)    | 1.3 (1.2 - 1.5) | 11.5 (2.2 - 31)       | 0.9 (0.7 - 0.9)   | 0 (0 - 0.1)      | 1.1 (1.1 - 1.1) |
|                  | 150  | 33 (18.2 - 54)     | 0.9 (0.9 - 0.9)   | 0.1 (0 - 0.1)    | 1.2 (1.2 - 1.2) | 37 (18 - 60.8)        | 0.9 (0.9 - 0.9)   | 0.1 (0 - 0.1)    | 1.1 (1.1 - 1.1) |
|                  | 200  | 28.5 (12.5 - 71.5) | 0.8 (0.8 - 0.9)   | 0.1 (0.1 - 0.1)  | 1.1 (1.1 - 1.2) | 45 (21 - 57.8)        | 0.9 (0.8 - 0.9)   | 0.1 (0.1 - 0.1)  | 1.1 (1.1 - 1.1) |
|                  | 300  | 26.5 (19 - 38)     | 0.8 (0.7 - 0.9)   | 0.1 (0.1 - 0.1)  | 1.1 (1 - 1.1)   | 65.5 (50.2 - 86.5)    | 0.9 (0.8 - 0.9)   | 0.1 (0.1 - 0.1)  | 1 (1 - 1.1)     |
|                  | 400  | 20.5 (18 - 30.2)   | 0.7 (0.7 - 0.8)   | 0.1 (0.1 - 0.2)  | 1 (0.9 - 1)     | 95 (74.8 - 111.5)     | 0.9 (0.8 - 0.9)   | 0.1 (0.1 - 0.1)  | 1 (1 - 1)       |
|                  | 600  | 24 (21.2 - 27.8)   | 0.6 (0.6 - 0.7)   | 0.2 (0.2 - 0.2)  | 0.9 (0.8 - 0.9) | 104 (86 - 120.5)      | 0.9 (0.8 - 0.9)   | 0.1 (0.1 - 0.2)  | 1 (1 - 1)       |
|                  | 800  | 25 (24 - 28.8)     | 0.6 (0.6 - 0.6)   | 0.3 (0.2 - 0.3)  | 0.8 (0.8 - 0.8) | 112 (94.2 - 131.8)    | 0.9 (0.8 - 0.9)   | 0.1 (0.1 - 0.2)  | 1 (0.9 - 1)     |
|                  | 1000 | 28.5 (26 - 30.8)   | 0.6 (0.5 - 0.6)   | 0.3 (0.3 - 0.3)  | 0.8 (0.8 - 0.8) | 104 (96.5 - 131)      | 0.8 (0.8 - 0.9)   | 0.1 (0.1 - 0.2)  | 0.9 (0.9 - 0.9) |
| <b>Example 5</b> | 50   | 14 (6.5 - 28.5)    | 0.9 (0.9 - 1)     | 0 (0 - 0)        | 1.4 (1.3 - 1.4) | 14.5 (1.2 - 27)       | 0.9 (0.9 - 1)     | 0 (0 - 0)        | 1.1 (1.1 - 1.2) |
|                  | 75   | 24 (14 - 51.2)     | 0.9 (0.9 - 1)     | 0 (0 - 0.1)      | 1.3 (1.3 - 1.5) | 16.5 (1.2 - 29.5)     | 0.9 (0.9 - 1)     | 0 (0 - 0)        | 1.1 (1.1 - 1.2) |
|                  | 100  | 34.5 (21 - 47.8)   | 0.9 (0.9 - 0.9)   | 0 (0 - 0.1)      | 1.3 (1.2 - 1.3) | 8 (1.2 - 16.5)        | 0.9 (0.6 - 1)     | 0 (0 - 0.1)      | 1.1 (1.1 - 1.1) |
|                  | 150  | 38 (27 - 71.2)     | 0.9 (0.9 - 0.9)   | 0.1 (0 - 0.1)    | 1.2 (1.2 - 1.3) | 25 (11.2 - 40)        | 0.9 (0.9 - 0.9)   | 0.1 (0 - 0.1)    | 1.1 (1.1 - 1.1) |
|                  | 200  | 26 (19 - 49.2)     | 0.9 (0.8 - 0.9)   | 0.1 (0.1 - 0.1)  | 1.1 (1.1 - 1.2) | 39.5 (16.2 - 56.2)    | 0.9 (0.8 - 0.9)   | 0.1 (0.1 - 0.1)  | 1.1 (1.1 - 1.1) |
|                  | 300  | 24 (19 - 30.2)     | 0.8 (0.7 - 0.8)   | 0.1 (0.1 - 0.2)  | 1 (1 - 1)       | 65 (48 - 90.8)        | 0.9 (0.8 - 0.9)   | 0.1 (0.1 - 0.1)  | 1 (1 - 1.1)     |
|                  | 400  | 20 (17 - 27.2)     | 0.7 (0.6 - 0.7)   | 0.2 (0.1 - 0.2)  | 1 (0.9 - 1)     | 79 (62.5 - 94.8)      | 0.9 (0.8 - 0.9)   | 0.1 (0.1 - 0.1)  | 1 (1 - 1.1)     |
|                  | 600  | 23 (20 - 25.8)     | 0.6 (0.6 - 0.7)   | 0.2 (0.2 - 0.2)  | 0.9 (0.9 - 0.9) | 100.5 (90 - 124.8)    | 0.9 (0.8 - 0.9)   | 0.1 (0.1 - 0.1)  | 1 (1 - 1)       |
|                  | 800  | 25 (22 - 27)       | 0.6 (0.6 - 0.6)   | 0.2 (0.2 - 0.3)  | 0.8 (0.8 - 0.8) | 115 (103.5 - 148.2)   | 0.9 (0.8 - 0.9)   | 0.1 (0.1 - 0.2)  | 1 (1 - 1)       |
|                  | 1000 | 26 (25 - 29)       | 0.6 (0.5 - 0.6)   | 0.3 (0.3 - 0.3)  | 0.8 (0.8 - 0.8) | 117 (108 - 127.5)     | 0.9 (0.8 - 0.9)   | 0.1 (0.1 - 0.1)  | 1 (1 - 1)       |

**Supplementary Table S3 | Stabl's performance on synthetic multi-omic data compared to Lasso.** Sparsity ( $|\hat{S}|$ ), reliability (FDR and JI), and predictivity (RMSE) of Stabl and late fusion Lasso are represented as median (IQR) for five examples of synthetic triple-omic datasets with 1450 uninformative and 50 informative features each (1500 features total).

| <b>Case study</b> | <b>PE</b> | <b>COVID</b> | <b>OOL</b> |              |       | <b>SSI</b> |       | <b>Dream</b> |           |
|-------------------|-----------|--------------|------------|--------------|-------|------------|-------|--------------|-----------|
| Omic              | CFRNA     | Proteomics   | Proteomics | Metabolomics | CyTOF | Proteomics | CyTOF | Taxonomy     | Phylotype |
| % Corr. > 0.7     | <1%       | 8%           | <1%        | <1%          | 3%    | 1%         | 2%    | 18%          | 5%        |
| % Corr. > 0.5     | <1%       | 16%          | 2%         | 2%           | 7%    | 3%         | 7%    | 35%          | 11%       |
| % Corr. > 0.2     | 13%       | 46%          | 20%        | 16%          | 35%   | 24%        | 37%   | 69%          | 41%       |

**Supplementary Table S4 | Correlation structure of all clinical case study datasets.**

|                                  | Predictivity            |                         |                         | Sparsity               |                    |                |                                  |
|----------------------------------|-------------------------|-------------------------|-------------------------|------------------------|--------------------|----------------|----------------------------------|
|                                  | SRM                     | StablsRM-MX             | StablsRM-RP             | SRM                    | StablsRM-MX        | StablsRM-RP    | p-value SRM vs. StablsRM-MX (RP) |
| <b>SSI</b>                       |                         |                         |                         |                        |                    |                |                                  |
| Lasso                            | 0.722 [0.580, 0.838]    | 0.818 [0.713, 0.903]    | NA                      | 61 [43.25, 83.25]      | 28.5 [20, 36]      | NA             | < 1e-16                          |
| ALasso                           | 0.757 [0.631, 0.876]    | 0.804 [0.703, 0.890]    | NA                      | 33 [25, 46]            | 24 [19, 30]        | NA             | 3.03E-06                         |
| EN                               | 0.752 [0.630, 0.860]    | 0.779 [0.677, 0.882]    | NA                      | 304.5 [186, 449.25]    | 30.5 [21.75, 48]   | NA             | < 1e-16                          |
| <b>COVID (Training cohort)</b>   |                         |                         |                         |                        |                    |                |                                  |
| Lasso                            | 0.858 [0.745, 0.952]    | 0.834 [0.718, 0.920]    | 0.847 [0.736, 0.935]    | 17.5 [8, 107.25]       | 9 [4, 17]          | 7 [4.75, 13]   | 1.84E-07 (4e-10)                 |
| ALasso                           | 0.863 [0.750, 0.948]    | 0.763 [0.638, 0.887]    | NA                      | 7.5 [3, 18.25]         | 6 [3, 8]           | NA             | 6.89E-05                         |
| EN                               | 0.878 [0.771, 0.954]    | 0.865 [0.767, 0.951]    | NA                      | 473 [22.25, 545]       | 16.5 [6, 63]       | NA             | 3.89E-14                         |
| <b>COVID (Validation cohort)</b> |                         |                         |                         |                        |                    |                |                                  |
| Lasso                            | 0.759 [0.708, 0.806]    | 0.749 [0.704, 0.790]    | 0.748 [0.706, 0.789]    |                        |                    |                |                                  |
| ALasso                           | 0.741 [0.690, 0.788]    | 0.758 [0.719, 0.802]    | NA                      |                        |                    |                |                                  |
| EN                               | 0.765 [0.715, 0.811]    | 0.734 [0.678, 0.785]    | NA                      |                        |                    |                |                                  |
| <b>PE</b>                        |                         |                         |                         |                        |                    |                |                                  |
| Lasso                            | 0.842 [0.781, 0.902]    | NA                      | 0.828 [0.759, 0.892]    | 251.5 [150.25, 358.25] | NA                 | 11 [8, 17]     | < 1e-16                          |
| ALasso                           | 0.833 [0.761, 0.895]    | NA                      | 0.799 [0.730, 0.870]    | 57 [38.5, 87.5]        | NA                 | 7 [5, 11]      | < 1e-16                          |
| EN                               | 0.830 [0.759, 0.893]    | NA                      | 0.859 [0.780, 0.927]    | 1576 [290.5, 1690.25]  | NA                 | 26 [15.5, 38]  | < 1e-16                          |
| <b>Dream</b>                     |                         |                         |                         |                        |                    |                |                                  |
| Lasso                            | 0.713 [0.686, 0.738]    | 0.687 [0.658, 0.716]    | 0.685 [0.663, 0.707]    | 638 [605.75, 675.25]   | 16 [13.75, 22]     | 28 [23.25, 32] | < 1e-16 (< 1e-16)                |
| ALasso                           | 0.710 [0.682, 0.738]    | 0.647 [0.617, 0.675]    | NA                      | 367 [336, 413.25]      | 10 [8, 13]         | NA             | < 1e-16                          |
| EN                               | 0.729 [0.703, 0.754]    | 0.685 [0.659, 0.713]    | NA                      | 3470 [3105.25, 3757]   | 25 [20, 36.75]     | NA             | < 1e-16                          |
| <b>OOL (Training cohort)</b>     |                         |                         |                         |                        |                    |                |                                  |
| Lasso                            | 14.659 [11.998, 17.823] | 15.033 [11.541, 19.063] | 14.949 [11.955, 18.351] | 194.5 [172, 218.25]    | 25 [20.75, 38.75]  | 25 [22 - 29]   | < 1e-16 (< 1e-16)                |
| ALasso                           | 14.885 [12.291, 17.814] | 14.954 [11.336, 19.139] | NA                      | 133 [106, 162]         | 25 [21, 36.25]     | NA             | < 1e-16                          |
| EN                               | 14.908 [12.417, 17.408] | 17.273 [12.758, 23.093] | NA                      | 470.5 [346, 590.5]     | 98 [55.75, 196.75] | NA             | < 1e-16                          |
| <b>OOL (Validation cohort)</b>   |                         |                         |                         |                        |                    |                |                                  |
| Lasso                            | 19.199 [13.933, 24.777] | 20.882 [16.567, 24.921] | 21.791 [16.703, 26.196] |                        |                    |                |                                  |
| ALasso                           | 20.068 [15.404, 24.294] | 20.882 [16.950, 24.849] | NA                      |                        |                    |                |                                  |
| EN                               | 19.088 [12.852, 25.003] | 24.934 [19.905, 29.488] | NA                      |                        |                    |                |                                  |

**Supplementary Table S5 | Benchmarking on clinical case studies: comprehensive table of results.** Significance of sparsity performances was calculated using a two-sided Mann Whitney test.

| <b>PE</b>                           | <b>Predictivity (ROC AUC)</b>  | <b>Predictivity (PR AUC)</b>   | <b>Sparsity (number of features)</b> |
|-------------------------------------|--------------------------------|--------------------------------|--------------------------------------|
| Stabl <sub>L</sub> -RP              | 0.829 [0.755, 0.898]           | 0.850 [0.766, 0.931]           | 11.000 [7.750, 16.000]               |
| SS (threshold 30%)                  | 0.832 [0.764, 0.894] (p=0.383) | 0.862 [0.778, 0.930] (p=0.281) | 10.500 [9.000, 12.250] (p=4.683e-01) |
| SS (threshold 50%)                  | 0.777 [0.694, 0.841] (p=0.014) | 0.856 [0.783, 0.913] (p=0.424) | 2.000 [2.000, 3.000] (p=6.495e-33)   |
| SS (threshold 80%)                  | 0.464 [0.432, 0.486] (p=0.0)   | 0.586 [0.507, 0.667] (p=0.0)   | 0.000 [0.000, 0.250] (p=3.266e-36)   |
| <b>COVID-19 (Training cohort)</b>   | <b>Predictivity (ROC AUC)</b>  | <b>Predictivity (PR AUC)</b>   | <b>Sparsity (number of features)</b> |
| Stabl <sub>L</sub> -RP              | 0.847 [0.736, 0.935]           | 0.736 [0.543, 0.918]           | 7.000 [4.750, 13.000]                |
| SS (threshold 30%)                  | 0.851 [0.746, 0.939] (p=0.463) | 0.739 [0.577, 0.923] (p=0.488) | 3.000 [2.000, 4.000] (p=4.864e-18)   |
| SS (threshold 50%)                  | 0.491 [0.442, 0.532] (p=0.0)   | 0.364 [0.254, 0.471] (p=0.0)   | 0.000 [0.000, 1.000] (p=1.026e-35)   |
| SS (threshold 80%)                  | 0.500 [0.500, 0.500] (p=0.0)   | 0.368 [0.250, 0.485] (p=0.0)   | 0.000 [0.000, 0.000] (p=5.108e-39)   |
| <b>COVID-19 (Validation cohort)</b> | <b>Predictivity (ROC AUC)</b>  | <b>Predictivity (PR AUC)</b>   |                                      |
| Stabl <sub>L</sub> -RP              | 0.748 [0.706, 0.789]           | 0.932 [0.912, 0.952]           |                                      |
| SS (threshold 30%)                  | 0.778 [0.734, 0.820] (p=0.056) | 0.946 [0.930, 0.962] (p=0.011) |                                      |
| SS (threshold 50%)                  | 0.722 [0.670, 0.768] (p=0.252) | 0.925 [0.901, 0.947] (p=0.289) |                                      |
| SS (threshold 80%)                  | 0.500 [0.500, 0.500] (p=0.0)   | 0.841 [0.814, 0.867] (p=0.0)   |                                      |

**Supplementary Table S6 | Stabl<sub>L</sub>'s performance on single-omic datasets compared to SS.**

Significance of sparsity performances was calculated using a two-sided Mann Whitney test, significance of predictivity performances was calculated using permutation testing.

| <b>Features</b> | <b>Coefficients</b> |
|-----------------|---------------------|
| CDK10           | 0.11                |
| MT-TM           | -1.34               |
| MT-TH           | 2.43                |
| HNRNPA3P6       | -0.81               |
| RPL34P34        | -0.71               |
| YWHAQP5         | 0.46                |
| RPL23AP7        | -1.45               |
| GOLGA5P1        | -0.76               |
| MTRNR2L8        | 0.01                |

**Supplementary Table S7 | Features selected by Stabl<sub>L</sub> for clinical case study 1: PE.**

| <b>Features</b> | <b>Coefficients</b> |
|-----------------|---------------------|
| CCL20           | 1.74                |
| CRTAC1          | -0.66               |
| MDGA1           | -2.03               |
| MZB1            | 2.93                |

**Supplementary Table S8 | Features selected by Stabl<sub>L</sub> for clinical case study 2: COVID-19.**



| Features                          | Coefficients |
|-----------------------------------|--------------|
| Granulocytes_S6_unstim            | -3.18        |
| Granulocytes_CREB_GMCSF           | -1.65        |
| Granulocytes_STAT1_IFNa           | -2.90        |
| NK_STAT1_IFNa                     | 17.86        |
| CD69negCD56loCD16negNK_STAT1_IFNa | -8.28        |
| CD56hiCD16negNK_MAPKAPK2_IL246    | 1.12         |
| Bcells                            | -0.91        |
| CCR5posCCR2posCD4Tem              | 4.46         |
| NKT                               | 2.59         |
| Granulocytes                      | 0.75         |
| Angiopoietin.2                    | -1.61        |
| Siglec.6                          | 4.09         |
| Activin.A                         | 4.28         |
| IL.1.R4                           | 2.03         |
| SLPI                              | 2.66         |
| MMP.12                            | -3.65        |
| PLXB2                             | -1.42        |
| X147.0663_4.7                     | 0.98         |
| X193.0618_5.3                     | 3.34         |
| X331.2264_8.1                     | 0.80         |
| X335.2226_9.3                     | -2.79        |
| X349.2371_7.5                     | 2.32         |
| X367.1495_0.8                     | 1.37         |
| X371.1895_10.6                    | 3.14         |
| X441.264_9.5                      | 1.28         |
| X443.208_8.4                      | 7.43         |
| X461.2387_8.7                     | -1.76        |

**Supplementary Table S9 | Features selected by Stabl for clinical case study 3: Time to labor.**

| <b>Patient characteristic</b>      | <b>No Surgical Site Infection, 83% (n=77)</b> | <b>Surgical Site Infection, 17% (n=16)</b> |
|------------------------------------|-----------------------------------------------|--------------------------------------------|
| Age (mean + SD)                    | 59.2 ± 13.9                                   | 58.8 ± 14.2                                |
| Male, % (n)                        | 49 (38)                                       | 50 (8)                                     |
| Ethnicity, black, % (n)            | 1 (1)                                         | 0 (0)                                      |
| BMI                                | 28.3 ± 6.5                                    | 26.6 ± 4.6                                 |
| <b>Surgical indication</b>         |                                               |                                            |
| Cancer                             | 58% (45)                                      | 25% (4)                                    |
| Inflammatory bowel disease         | 6% (5)                                        | 12.5% (2)                                  |
| Other                              | 35% (27)                                      | 62.5% (10)                                 |
| <b>Type of surgery</b>             |                                               |                                            |
| Colectomy                          | 64% (49)                                      | 56% (9)                                    |
| Small bowels                       | 3% (2)                                        | 6% (1)                                     |
| Other                              | 34% (26)                                      | 37% (6)                                    |
| <b>Surgical approach</b>           |                                               |                                            |
| Minimally invasive                 | 32% (25)                                      | 32% (5)                                    |
| Open surgery                       | 68% (52)                                      | 68% (11)                                   |
| Operative duration, min, mean ± SD | 213 ± 132                                     | 234 ± 111                                  |
| ASA classification, median         | 3                                             | 2.5                                        |

**Supplementary Table S10 | Clinical information for clinical case study 4: SSI.**

| Target    | Clone          | Supplier           | Catalog #  | Concentration (µg/ml) | Comment            |
|-----------|----------------|--------------------|------------|-----------------------|--------------------|
| CD235ab   | HIR2           | Biologend          | 306615     | 1                     |                    |
| CD61      | VI-PL2         | BD                 | 555752     | 0.5                   |                    |
| CD45      | HI30           | Biologend          | 304045     | 1                     |                    |
| CD66      | CD66a-B1.1     | BD                 | 551354     | 1                     |                    |
| CD7       | M-T701         | BD                 | 555359     | 1                     |                    |
| CD19      | HIB19          | Biologend          | 302247     | 1                     |                    |
| CD45RA    | HI100          | Biologend          | 304143     | 1                     |                    |
| CD11b     | ICRF44         | Biologend          | 301337     | 2                     |                    |
| CD4       | RPA-T4         | Biologend          | 300541     | 2                     |                    |
| CD8a      | RPA-T8         | BD                 | 557084     | 1                     |                    |
| CD11c     | Bu15           | Biologend          | 337221     | 1                     |                    |
| CD123     | 6H6            | Biologend          | 306027     | 1                     |                    |
| TCRγδ     | B1             | BD                 | 555715     | 4                     |                    |
| FcεR1α    | AER-37 (CRA-1) | Biologend          | 334602     | 0.5                   |                    |
| CD161     | HP-3G10        | Biologend          | 339919     | 4                     |                    |
| CD33      | WM53           | Biologend          | 303419     | 2                     |                    |
| CRTH2     | BM16           | Biologend          | 350102     | 4                     |                    |
| CD16      | 3G8            | Biologend          | 302051     | 2                     |                    |
| CD25      | M-A251         | Biologend          | 356102     | 2                     |                    |
| CD3       | UCHT1          | Biologend          | 300443     | 1                     |                    |
| CXCR4     | 12G5           | Biologend          | 306502     | 4                     |                    |
| CD62L     | DREG.200       | Thermo Fisher      | BMS1015    | 0.5                   |                    |
| CCR2      | K036C2         | Biologend          | 357202     | 2                     |                    |
| HLA-DR    | L243           | Biologend          | 307651     | 2                     |                    |
| CD14      | M5E2           | Biologend          | 301843     | 4                     |                    |
| CD56      | NCAM16.2       | BD                 | 559043     | 1                     |                    |
| OLFM4     | hOLFM4         | Matt Alder (CCHMC) | -          | 4                     | Received as a gift |
| pCREB     | 87G3           | CST                | 9198       | 2                     | Custom synthesis   |
| pSTAT5    | C11C5          | CST                | 51879SF    | 4                     |                    |
| pp38      | 36/p38         | BD                 | 612281     | 2                     | Custom synthesis   |
| pSTAT1    | 14/P-STAT1     | BD                 | 612132     | 1                     | Custom synthesis   |
| pSTAT3    | M9C6           | CST                | 74309SF    | 4                     |                    |
| pS6       | D57.2.2E       | CST                | 4858       | 2                     | Custom synthesis   |
| pMAPKAPK2 | 27B7           | CST                | 3007       | 1                     | Custom synthesis   |
| Tbet      | 4B10           | Thermo Fisher      | 14-5825-82 | 8                     |                    |
| cPARP     | F21-852        | BD                 | 552597     | 2                     |                    |
| FoxP3     | PCH101         | Thermo Fisher      | 14-4776-82 | 10                    |                    |
| IκB       | L35A5          | CST                | 4814       | 8                     | Custom synthesis   |
| pNFκB     | K10-895.12.50  | BD                 | 558393     | 2                     |                    |
| pERK1/2   | D13.14.4E      | CST                | 45899SF    | 2                     |                    |
| pSTAT6    | A15137E        | Biologend          | 686002     | 2                     |                    |

**Supplementary Table S11 | Antibody panel for clinical case study 4: SSI.**

| Features                       | Coefficients |
|--------------------------------|--------------|
| unstim_CD4Trm_Frequency        | 4.90         |
| unstim_Tregnaive_Frequency     | 0.84         |
| IL246_Granulocytes_154Sm_STAT3 | -0.02        |
| IL246_Th1naive_153Eu_STAT1     | 1.89         |
| SAMHD1                         | 2.69         |
| ARL11                          | 3.28         |
| LDLR                           | 3.37         |
| RNASET2                        | 1.65         |
| HSPH1                          | 2.22         |
| WVOX                           | 2.82         |
| MTHFD2                         | 0.67         |
| OGG1                           | -4.60        |
| ITGAV ITGB3                    | -2.78        |
| CNTN3                          | -0.17        |
| CTNNA3                         | 1.35         |
| IL1B                           | 3.68         |
| CCL3                           | 3.69         |
| FCGR1A                         | 1.88         |
| MAPK8                          | 2.49         |
| CSF2                           | 1.16         |
| PPIB                           | -0.31        |
| BIRC3                          | -2.88        |
| IL18                           | 1.92         |
| ASAH1                          | 1.93         |
| ALK                            | 3.04         |
| TNFSF10                        | 1.77         |
| RAP2A                          | 0.37         |
| TOPBP1                         | 0.75         |
| IRF6                           | 0.15         |

**Supplementary Table S12 | Features selected by Stabl for clinical case study 4: SSI.**

|                      | CFRNA    | COVID-19 | OOL     | Biobank  | Dream    |
|----------------------|----------|----------|---------|----------|----------|
| <b>Preprocessing</b> |          |          |         |          |          |
| Variance threshold   | 0.01     | 0.01     | 0.01    | 0.01     | 0.01     |
| Low info filter      | 0.2      | 0.2      | 0.2     | 0.2      | 0.2      |
| Simple Imputer       | median   | median   | median  | median   | median   |
| StandardScaler       | default  | default  | default | default  | default  |
| Class weight         | Balanced | Balanced |         | Balanced | Balanced |

### Training-CV

| General Stabl parameters |                                                                                  |                                                                                  |                                                                                   |                                                                                  |                                                                                     |
|--------------------------|----------------------------------------------------------------------------------|----------------------------------------------------------------------------------|-----------------------------------------------------------------------------------|----------------------------------------------------------------------------------|-------------------------------------------------------------------------------------|
| FDR range (Step)         | 0.1 - 1 (0.01)                                                                   | 0.1 - 1 (0.01)                                                                   | 0.1 - 1 (0.01)                                                                    | 0.1 - 1 (0.01)                                                                   | 0.1 - 1 (0.01)                                                                      |
| Lambda name              | C                                                                                | C                                                                                | alpha                                                                             | C                                                                                | C                                                                                   |
| Artificial proportion    | 0.5                                                                              | 1                                                                                | 1                                                                                 | 1                                                                                | 0.5                                                                                 |
| Artificial type          | RP                                                                               | MX                                                                               | MX                                                                                | MX                                                                               | MX                                                                                  |
| Sample fraction          | 0.5                                                                              | 0.5                                                                              | 0.5                                                                               | 0.5                                                                              | 0.5                                                                                 |
| Replace                  | FALSE                                                                            | FALSE                                                                            | FALSE                                                                             | FALSE                                                                            | FALSE                                                                               |
| Random state             | 42                                                                               | 42                                                                               | 42                                                                                | 1                                                                                | 42                                                                                  |
| Splitter                 | GroupShuffleSplit                                                                | RepeatedStratifiedKfold                                                          | GroupShuffleSplit                                                                 | RepeatedStratifiedKfold                                                          | GroupShuffleSplit                                                                   |
| Splitter N (splits)      | 100                                                                              | 5                                                                                | 100                                                                               | 5                                                                                | 100                                                                                 |
| Splitter N (repeats)     |                                                                                  | 20                                                                               |                                                                                   | 20                                                                               |                                                                                     |
| Test size                | 0.2                                                                              |                                                                                  | 0.2                                                                               |                                                                                  | 0.2                                                                                 |
| Stabl                    |                                                                                  |                                                                                  |                                                                                   |                                                                                  |                                                                                     |
| N bootstraps             | 150                                                                              | 1000                                                                             | 300                                                                               | 500                                                                              | 100                                                                                 |
| Lambda grid              | Linear, 0.01, 1, 10                                                              | Linear, 0.01, 1, 10                                                              | Log, 0, 2, 10                                                                     | Linear, 0.01, 1, 10                                                              | Linear, 0.004, 0.4, 10                                                              |
| Solver                   | liblinear                                                                        | liblinear                                                                        |                                                                                   | liblinear                                                                        | liblinear                                                                           |
| Stabl                    |                                                                                  |                                                                                  |                                                                                   |                                                                                  |                                                                                     |
| N bootstraps             | 150                                                                              | 1000                                                                             | 300                                                                               | 500                                                                              | 100                                                                                 |
| Lambda grid              | Linear, 0.01, 10, 10                                                             | Linear, 0.01, 10, 10                                                             | Log, 0, 2, 10                                                                     | Linear, 0.01, 10, 10                                                             | Linear, 0.004, 4, 10                                                                |
| Solver                   | liblinear                                                                        | liblinear                                                                        |                                                                                   | liblinear                                                                        | liblinear                                                                           |
| Stabl                    |                                                                                  |                                                                                  |                                                                                   |                                                                                  |                                                                                     |
| N bootstraps             | 50                                                                               | 100                                                                              | 300                                                                               | 100                                                                              | 50                                                                                  |
| Lambda grid              | L1R = 0.5: Log, -2, 1, 5<br>L1R = 0.7: Log, -2, 1, 5<br>L1R = 0.9: Log, -2, 1, 5 | L1R = 0.5: Log, -2, 1, 5<br>L1R = 0.7: Log, -2, 1, 5<br>L1R = 0.9: Log, -2, 1, 5 | L1R = 0.5: Log, 1, 2, 5<br>L1R = 0.7: Log, 0.5, 2, 5<br>L1R = 0.9: Log, 0.5, 2, 5 | L1R = 0.5: Log, -2, 0, 5<br>L1R = 0.7: Log, -2, 0, 5<br>L1R = 0.9: Log, -2, 0, 5 | L1R = 0.2: Log, -3, -2, 5<br>L1R = 0.5: Log, -3, -2, 5<br>L1R = 0.8: Log, -3, -2, 5 |
| Solver                   | saga                                                                             | saga                                                                             |                                                                                   | saga                                                                             | saga                                                                                |
| BaseSRMs                 |                                                                                  |                                                                                  |                                                                                   |                                                                                  |                                                                                     |
| Splitter Type            | RepeatedStratifiedKfold                                                          | RepeatedStratifiedKfold                                                          | RepeatedStratifiedKfold                                                           | RepeatedStratifiedKfold                                                          | RepeatedStratifiedKfold                                                             |
| Splitter n (splits)      | 5                                                                                | 5                                                                                | 5                                                                                 | 5                                                                                | 5                                                                                   |
| Splitter n (repeats)     | 5                                                                                | 5                                                                                | 5                                                                                 | 5                                                                                | 5                                                                                   |
| random state             | 42                                                                               | 42                                                                               | 42                                                                                | 42                                                                               | 42                                                                                  |
| Lambda grid (Lasso)      | Log, -2, 2, 30                                                                   | Log, -2, 2, 30                                                                   | Log, -2, 2, 30                                                                    | Log, -2, 2, 30                                                                   | Log, -3, 0, 30                                                                      |
| Lambda grid (ALasso)     | Log, -2, 2, 20                                                                   | Log, -2, 2, 20                                                                   | Log, -2, 2, 30                                                                    | Log, -2, 2, 30                                                                   | Log, -3, 0, 30                                                                      |
| Lambda grid (EN)         | Log, -2, 1, 10                                                                   | Log, -2, 1, 10                                                                   | Log, -2, 2, 10                                                                    | Log, -2, 1, 10                                                                   | Log, -2, 1, 10                                                                      |
| L1 Ratio (L1R)           | 0.5, 0.7, and 0.9                                                                | 0.5, 0.7, and 0.9                                                                | 0.5, 0.7, and 0.9                                                                 | 0.5, 0.7, and 0.9                                                                | Linear, 0.2, 0.8, 3                                                                 |

### Training-Validation

| General Stabl parameters |                                                                                  |                                                                                     |                                                                                      |                                                                                     |                                                                                     |
|--------------------------|----------------------------------------------------------------------------------|-------------------------------------------------------------------------------------|--------------------------------------------------------------------------------------|-------------------------------------------------------------------------------------|-------------------------------------------------------------------------------------|
| FDR range (Step)         | 0.1 - 1 (0.01)                                                                   | 0.1 - 1 (0.01)                                                                      | 0.1 - 1 (0.01)                                                                       | 0.1 - 1 (0.01)                                                                      | 0.1 - 1 (0.01)                                                                      |
| Lambda name              | C                                                                                | C                                                                                   | alpha                                                                                | C                                                                                   | C                                                                                   |
| Artificial proportion    | 1                                                                                | 1                                                                                   | 1                                                                                    | 1                                                                                   | 0.5                                                                                 |
| Artificial type          | RP                                                                               | MX                                                                                  | MX                                                                                   | MX                                                                                  | MX                                                                                  |
| Sample fraction          | 0.5                                                                              | 0.5                                                                                 | 0.5                                                                                  | 0.5                                                                                 | 0.5                                                                                 |
| Replace                  | FALSE                                                                            | FALSE                                                                               | FALSE                                                                                | FALSE                                                                               | FALSE                                                                               |
| Random state             | 42                                                                               | 42                                                                                  | 42                                                                                   | 1                                                                                   | 42                                                                                  |
| Stabl                    |                                                                                  |                                                                                     |                                                                                      |                                                                                     |                                                                                     |
| N bootstraps             | 300                                                                              | 5000                                                                                | 2000                                                                                 | 5000                                                                                | 250                                                                                 |
| Lambda grid              | Linear, 0.01, 1, 10                                                              | Linear, 0.01, 1, 30                                                                 | Log, 0, 2, 30                                                                        | Linear, 0.01, 1, 30                                                                 | Linear, 0.004, 0.4, 30                                                              |
| Solver                   | liblinear                                                                        | liblinear                                                                           |                                                                                      | liblinear                                                                           | liblinear                                                                           |
| Stabl                    |                                                                                  |                                                                                     |                                                                                      |                                                                                     |                                                                                     |
| N bootstraps             | 300                                                                              | 5000                                                                                | 2000                                                                                 | 5000                                                                                | 250                                                                                 |
| Lambda grid              | Linear, 0.01, 10, 10                                                             | Linear, 0.01, 10, 30                                                                | Log, 0, 2, 30                                                                        | Linear, 0.01, 10, 30                                                                | Linear, 0.004, 4, 30                                                                |
| Solver                   | liblinear                                                                        | liblinear                                                                           |                                                                                      | liblinear                                                                           | liblinear                                                                           |
| Stabl                    |                                                                                  |                                                                                     |                                                                                      |                                                                                     |                                                                                     |
| N bootstraps             | 100                                                                              | 200                                                                                 | 2000                                                                                 | 1000                                                                                | 50                                                                                  |
| Lambda grid              | L1R = 0.5: Log, -2, 1, 5<br>L1R = 0.7: Log, -2, 1, 5<br>L1R = 0.9: Log, -2, 1, 5 | L1R = 0.5: Log, -2, 1, 10<br>L1R = 0.7: Log, -2, 1, 10<br>L1R = 0.9: Log, -2, 1, 10 | L1R = 0.5: Log, 1, 2, 10<br>L1R = 0.7: Log, 0.5, 2, 10<br>L1R = 0.9: Log, 0.5, 2, 10 | L1R = 0.5: Log, -2, 0, 10<br>L1R = 0.7: Log, -2, 0, 10<br>L1R = 0.9: Log, -2, 0, 10 | L1R = 0.2: Log, -3, -1, 5<br>L1R = 0.5: Log, -3, -1, 5<br>L1R = 0.8: Log, -3, -1, 5 |
| Solver                   | saga                                                                             | saga                                                                                | saga                                                                                 | saga                                                                                | saga                                                                                |
| BaseSRMs                 |                                                                                  |                                                                                     |                                                                                      |                                                                                     |                                                                                     |
| Splitter Type            | RepeatedStratifiedKfold                                                          | RepeatedStratifiedKfold                                                             | RepeatedStratifiedKfold                                                              | RepeatedStratifiedKfold                                                             | RepeatedStratifiedKfold                                                             |
| Splitter n (splits)      | 5                                                                                | 5                                                                                   | 5                                                                                    | 5                                                                                   | 5                                                                                   |
| Splitter n (repeats)     | 5                                                                                | 5                                                                                   | 5                                                                                    | 5                                                                                   | 5                                                                                   |
| random state             | 42                                                                               | 42                                                                                  | 42                                                                                   | 42                                                                                  | 42                                                                                  |
| Lambda grid (Lasso)      | Log, -2, 2, 30                                                                   | Log, -2, 2, 30                                                                      | Log, -2, 2, 30                                                                       | Log, -2, 2, 30                                                                      | Log, -3, 0, 30                                                                      |
| Lambda grid (ALasso)     | Log, -2, 2, 20                                                                   | Log, -2, 2, 20                                                                      | Log, -2, 2, 30                                                                       | Log, -2, 2, 30                                                                      | Log, -3, 0, 30                                                                      |
| Lambda grid (EN)         | Log, -2, 1, 10                                                                   | Log, -2, 1, 10                                                                      | Log, -2, 2, 10                                                                       | Log, -2, 1, 10                                                                      | Log, -3, 0, 10                                                                      |
| L1 Ratio (L1R)           | 0.5, 0.7, and 0.9                                                                | 0.5, 0.7, and 0.9                                                                   | 0.5, 0.7, and 0.9                                                                    | 0.5, 0.7, and 0.9                                                                   | 0.5, 0.7, and 0.9                                                                   |

**Supplementary Table S13 | List of hyperparameters used in all clinical case studies.** All other parameters were default.
